# Supplementary material
Source: PubMed Central journal article supplement (PMC3805360)
Supplement: NIHMS430109-supplement-Supplement1.pdf [file NIHMS430109-supplement-Supplement1.pdf]

## Supplementary Appendix

This appendix has been provided by the authors to give readers additional information about their work.

Supplement to: de Lima M, McNiece I, Robinson SN, et al. Cord-blood engraftment with ex vivo mesenchymal-cell coculture. *N Engl J Med* 2012;367:2305-15. DOI: [10.1056/NEJMoa1207285](https://doi.org/10.1056/NEJMoa1207285)

## Supplementary Appendix

Supplement to: Marcos de Lima, Ian McNiece, Simon N Robinson. et al. Ex-vivo Co-culture with Mesenchymal Cells Improves Engraftment of Cord Blood.

Contents:

- |              |        |
|--------------|--------|
| 1. Figure S1 | Page 2 |
| 2. Figure S2 | Page 3 |
| 3. Table S1  | Page 4 |

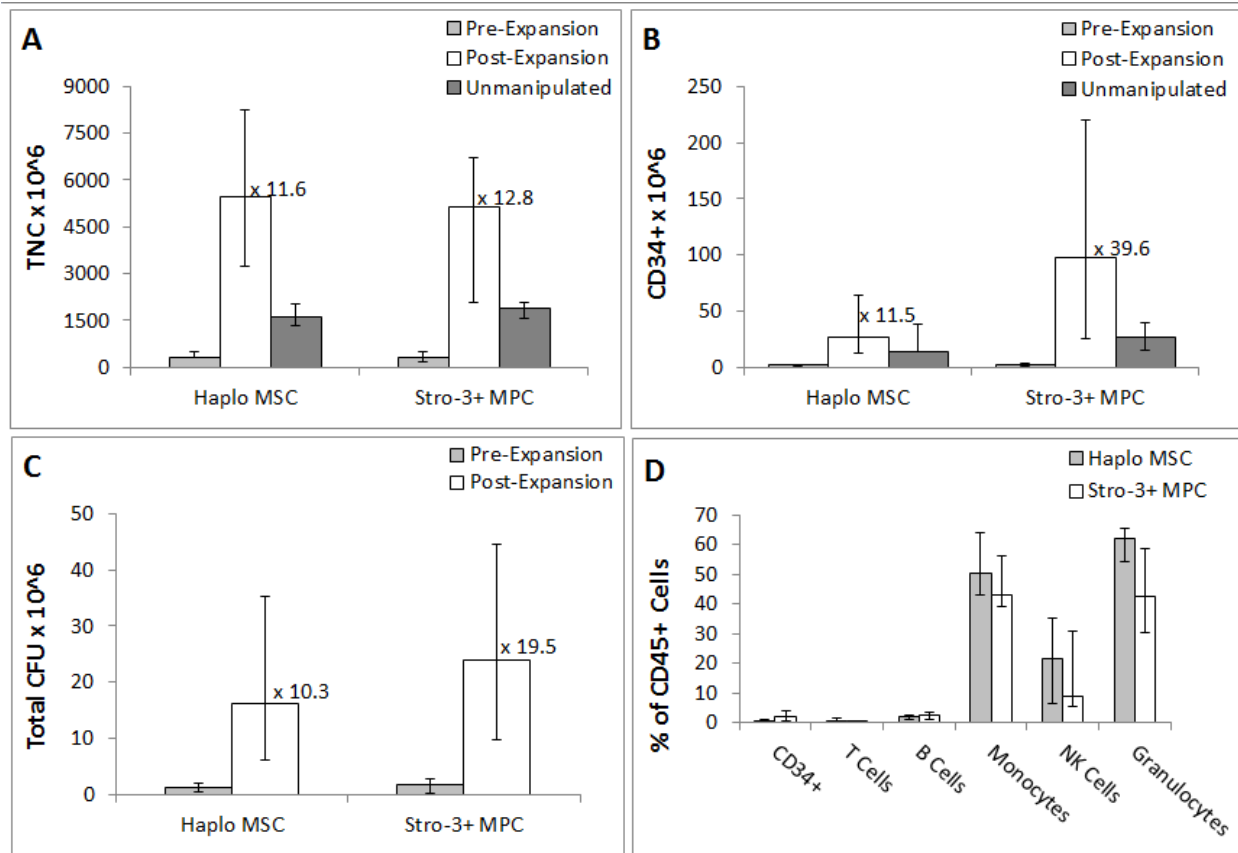

**Figure S1.** TNC (A), CD34<sup>+</sup> cells (B), CFU-C (C) when the haploidentical family- derived MSCs were used versus the off-the-shelf STRO-3<sup>+</sup> MPCs for CB expansion. Leukocyte populations in the expanded cord unit are shown in 1D. Values are expressed as the median  $\pm$  1<sup>st</sup> and 3<sup>rd</sup> quartile range. For all the parameters measured, there was no statistically significant difference between the family-derived MSCs and off-the-shelf STRO-3<sup>+</sup> MPCs  $p=0.59$  for TNC;  $0.13$  for CD34<sup>+</sup> cells; and  $0.47$  for CFU-C. Similarly there was no statistical difference in the various leukocyte populations (D) present in the expanded cords cultured over either the family-derived MSCs and STRO-3<sup>+</sup> MPCs ( $p=0.06$  for %CD34<sup>+</sup>;  $0.33$  for T cells;  $0.55$  for B Cells;  $0.56$  for monocytes;  $0.81$  for NK Cells and  $0.09$  for granulocytes)  
 Abbreviations: haplo, haploidentical; TNC, total nucleated cells; MSC, mesenchymal stromal cells; MPC, mesenchymal progenitor cells; CIBMTR, Center for International Bone Marrow Transplant Research; T cells, T lymphocytes; B cells, B lymphocytes.

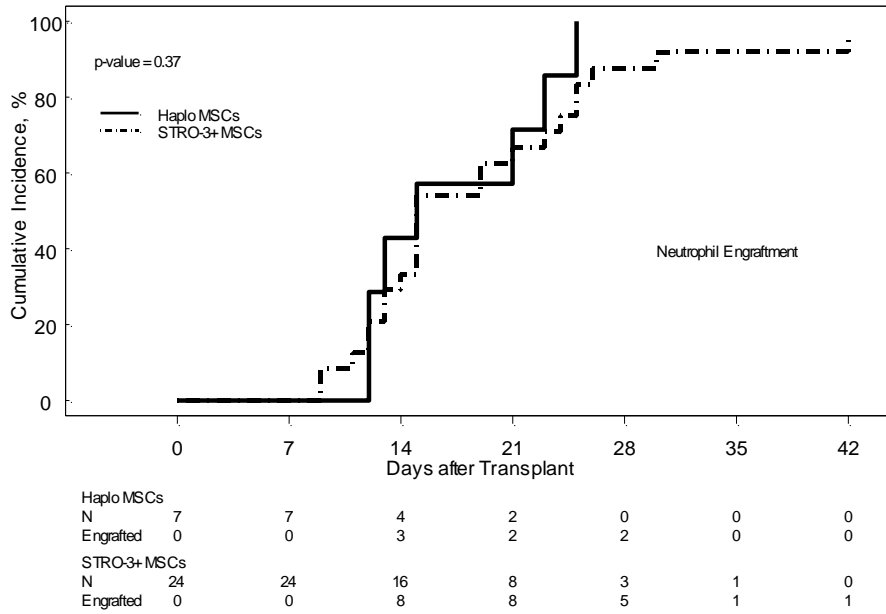

Abbreviations: MSC, mesenchymal stromal cells; MPC, mesenchymal progenitor cells.

Figure S2. Cumulative incidence of neutrophil engraftment of patients whose CB unit was expanded in co-culture with family-derived haploidentical MSCs (solid line) or off-the-shelf STRO-3<sup>+</sup> MSCs (dashed line).

**Table S1. Engraftment by MSC Source**

| Engrafting Patients      | Days to ANC > 500 |                | Days to Platelets > 20K |                |
|--------------------------|-------------------|----------------|-------------------------|----------------|
|                          | N                 | median (range) | N                       | median (range) |
| Haplo MSCs               | 7                 | 15 (12-25)     | 6 <sup>a</sup>          | 43 (27-52)     |
| STRO-3 <sup>+</sup> MPCs | 23 <sup>b</sup>   | 15 (9-42)      | 18 <sup>c</sup>         | 42(15-62)      |

a. One haplo MSC recipient died on day 40 before engrafting platelets.

b. One STRO-3<sup>+</sup> patient died on day 31 before engrafting neutrophils.

c. Six STRO-3<sup>+</sup> patients died on days 31, 54, 65, 119, 121, and 217 before engrafting platelets.

Abbreviations: haplo, haploidentical; MSC, mesenchymal stromal cells; MPC, mesenchymal progenitor cells.
